# Supplementary material for: The crystalline/amorphous stacking structure of SnO2 microspheres for excellent NO photocatalytic performance
Source: Royal Society of Chemistry journal article supplement (doi:10.1039/d0ta12101k), 2021-01-01
Supplement: d0ta12101k1.pdf [file d0ta12101k1.pdf]

## Supporting Information

### The crystalline/amorphous stacking structure of SnO<sub>2</sub> microspheres for the excellent NO photocatalytic performance

Li Zhang<sup>\*a</sup>, Ruobing Tong<sup>a</sup>, Sagar E. Shirsath<sup>b</sup>, Yanling Yang<sup>a</sup>, Guohui Dong<sup>\*c</sup>

To understand the formation of oxygen vacancy, XPS was carried out to determine the element surface chemical compositions and valence states of different SnO<sub>2</sub> samples. From the XPS survey spectra, O, Sn and C elements can be observed in all samples. As indicated in Figure 6, the O content first decreases as increases reaction time to 6h and increases when further increasing reaction time. The Sn and O element contents of all samples were listed in Table 1. With increasing the reaction time, the O contents in SnO<sub>2</sub>-3h, SnO<sub>2</sub>-6h, SnO<sub>2</sub>-9h, SnO<sub>2</sub>-12h samples are 67.33 %, 51.99 %, 58.84 %, and 64.51 % and the corresponding chemical compositions are calculated to SnO<sub>2.06</sub>, SnO<sub>1.08</sub>, SnO<sub>1.43</sub> and SnO<sub>1.82</sub>, respectively. The SnO<sub>2</sub>-6h sample contains minimum O content, which implies most oxygen vacancies in contrast to other samples. The results are consistent with the above EPR results. In addition, the high resolution Sn3d XPS spectra of different samples were also analysed in Figure 5. The spectra of Sn3d in all samples are made up of two characteristic peaks at around 486.8 and 495.3 eV, corresponding to Sn3d<sub>5/2</sub> and Sn3d<sub>3/2</sub> peaks of Sn<sup>4+</sup>. However, these two peaks in SnO<sub>2</sub>-6h shift towards higher energy states with ~ 0.4-0.5 eV. This may be associated to the oxygen vacancy inducing the reduction of the electronic density around Sn atom.

**Table S1.** Elemental analyses of the SnO<sub>2</sub> materials

| sample                | Sn(%) | O(%)  | O/Sn ratio |
|-----------------------|-------|-------|------------|
| SnO <sub>2</sub> -3h  | 32.67 | 67.33 | 2.06       |
| SnO <sub>2</sub> -6h  | 48.01 | 51.99 | 1.08       |
| SnO <sub>2</sub> -9h  | 41.16 | 58.84 | 1.43       |
| SnO <sub>2</sub> -12h | 35.49 | 64.51 | 1.82       |

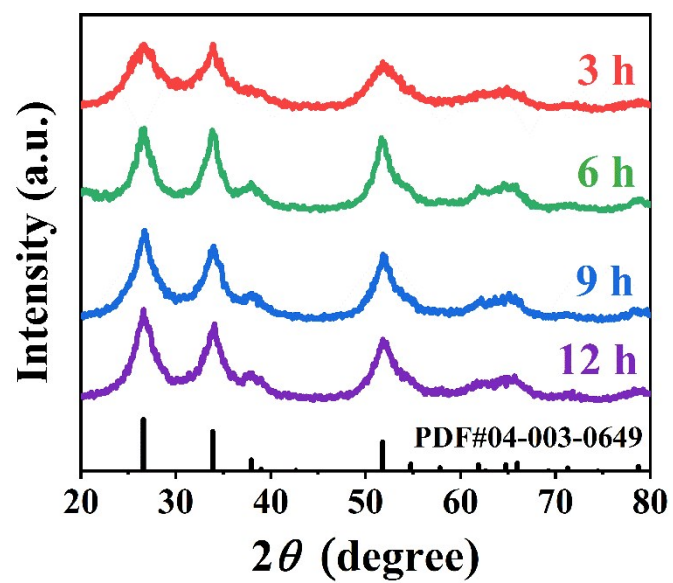

**Figure S1.** XRD patterns of all samples

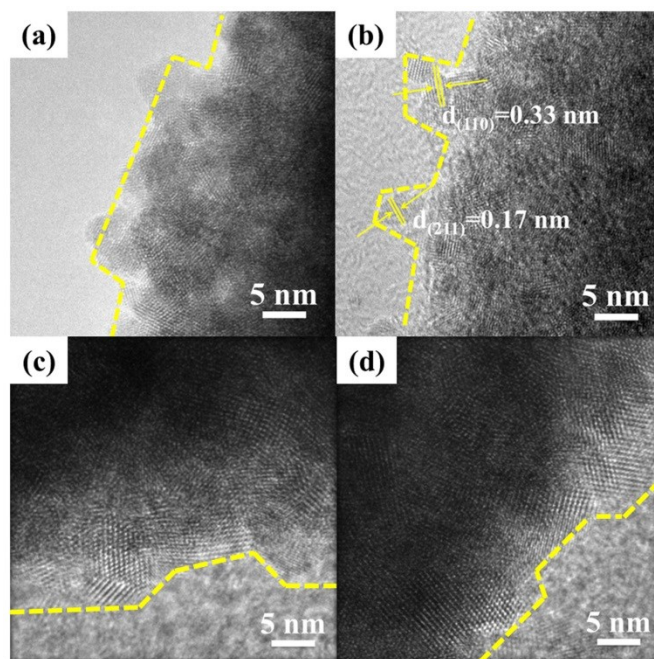

**Figure S2.** HRTEM images of as synthesized samples.

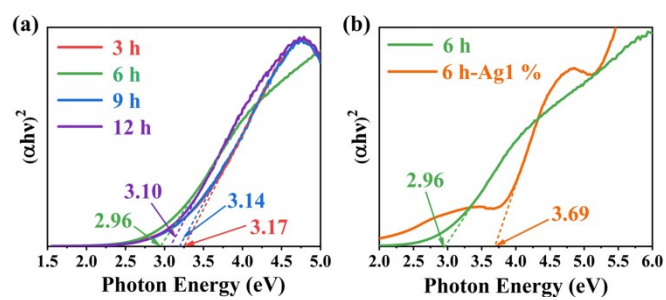

**Figure S3.** (a) Tauc plots of SnO<sub>2</sub> samples; (b) Tauc plots of the SnO<sub>2</sub>-Ag1% and SnO<sub>2</sub>-6h samples. The plot of  $(\alpha h\nu)^2$  vs  $h\nu$  is presented in Figure based on the equation of  $(\alpha h\nu)^n = A (h\nu - E_g)$ , where  $\alpha$ ,  $h$ ,  $\nu$  and  $A$  are the absorption coefficient, Planck constant, frequency and constant, respectively.

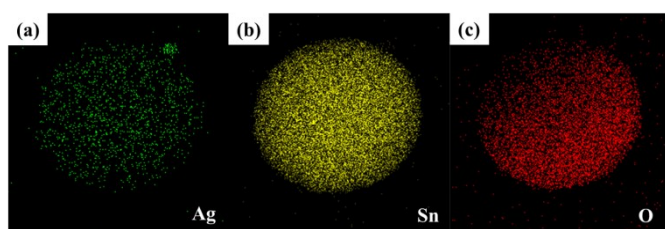

**Figure S4.** Elemental mapping of 1% Ag coated SnO<sub>2</sub>-6h sample.
